# Supplementary material for: Extraction, Purification, and Elucidation of Six Ginkgol Homologs from Ginkgo biloba Sarcotesta and Evaluation of Their Anticancer Activities
Source: MDPI journal article supplement (doi:10.3390/molecules27227777), 2022-11-11
Supplement: s1 [file s1]

---

## Supplementary materials

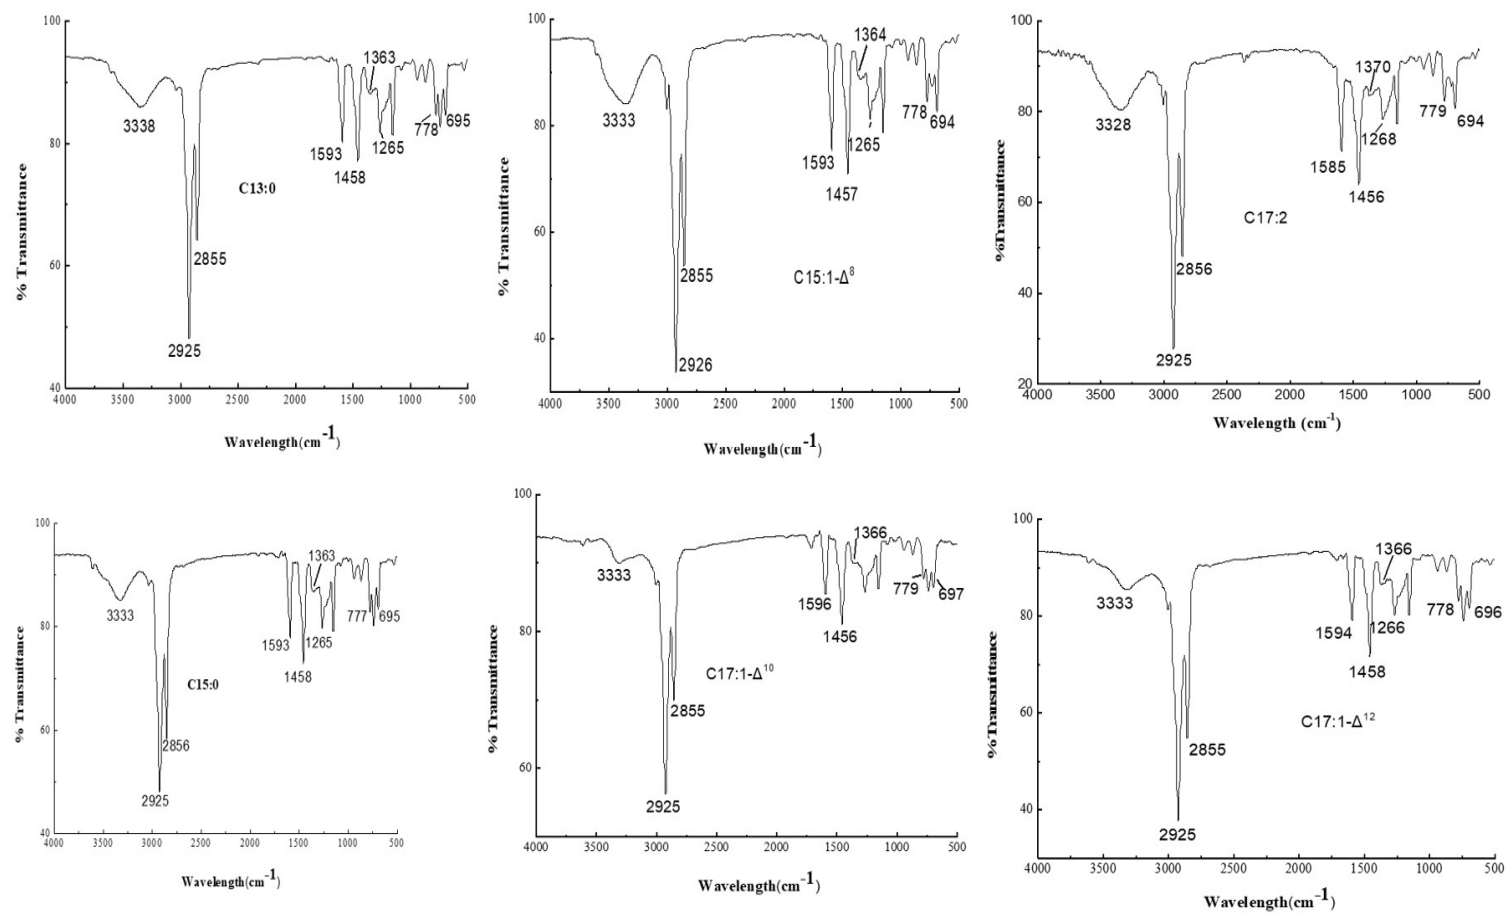

**Figure S1.** FTIR spectra of six ginkgols.

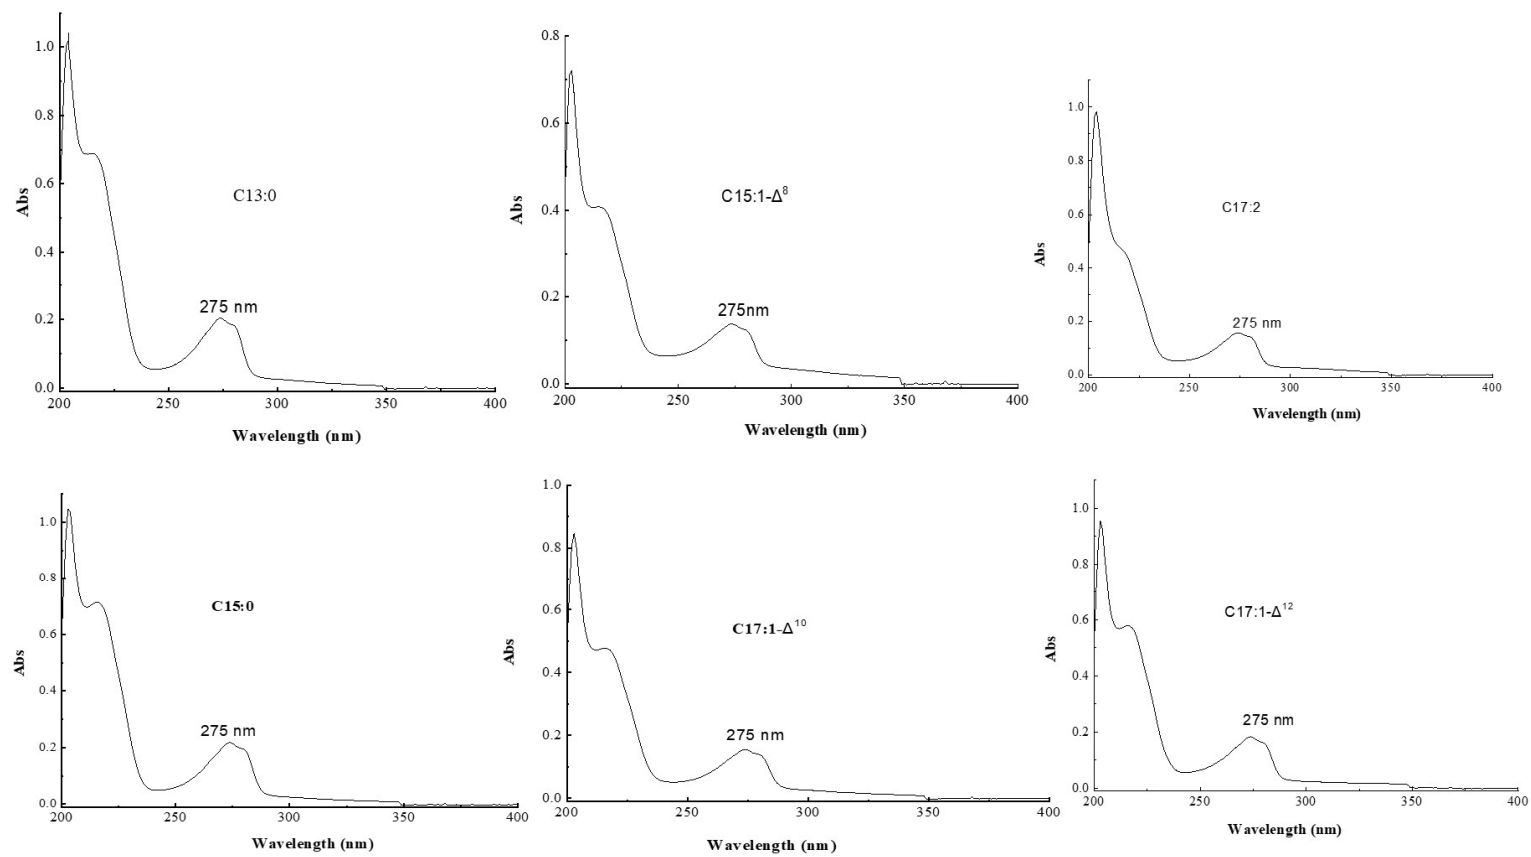

**Figure S2.** UV spectra of six ginkgols.

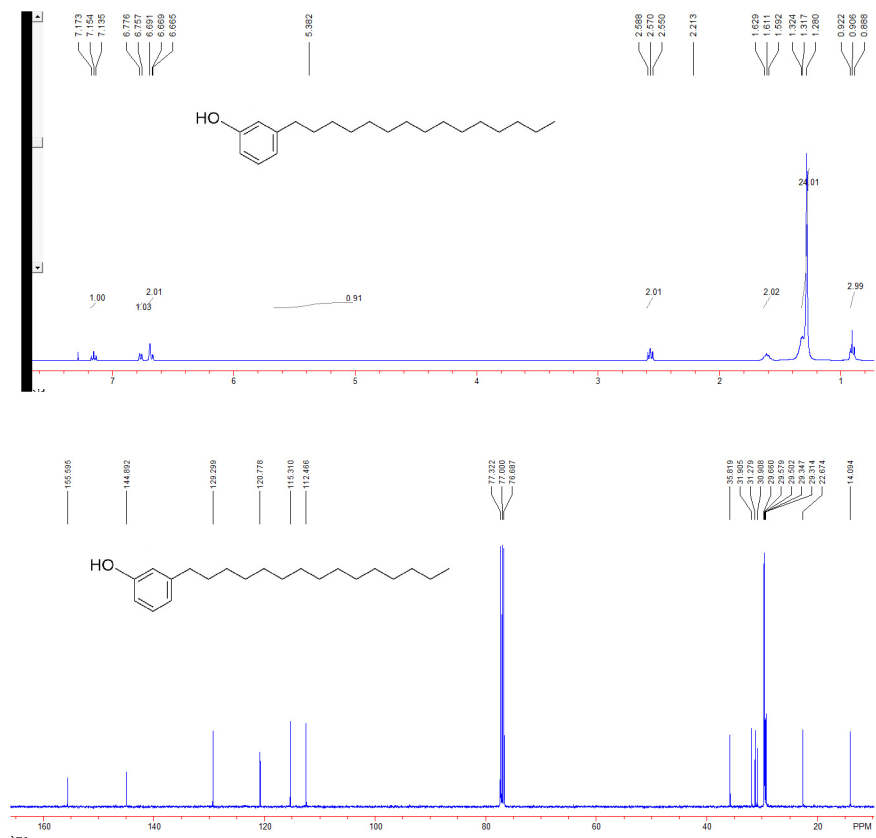

Ginkgol C15:0

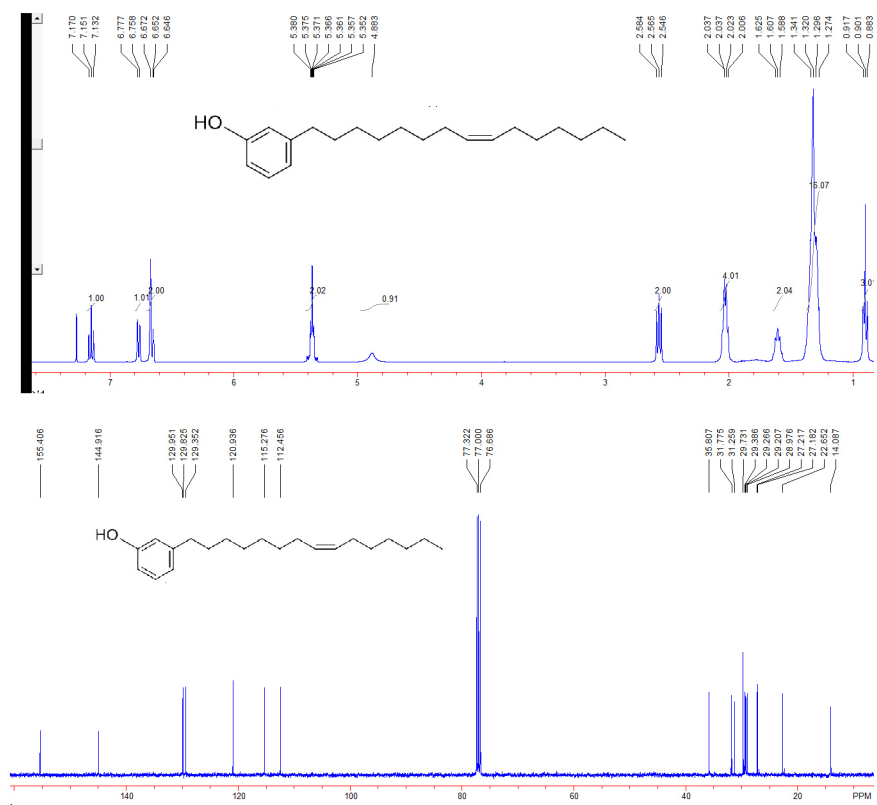

Ginkgol C15:1

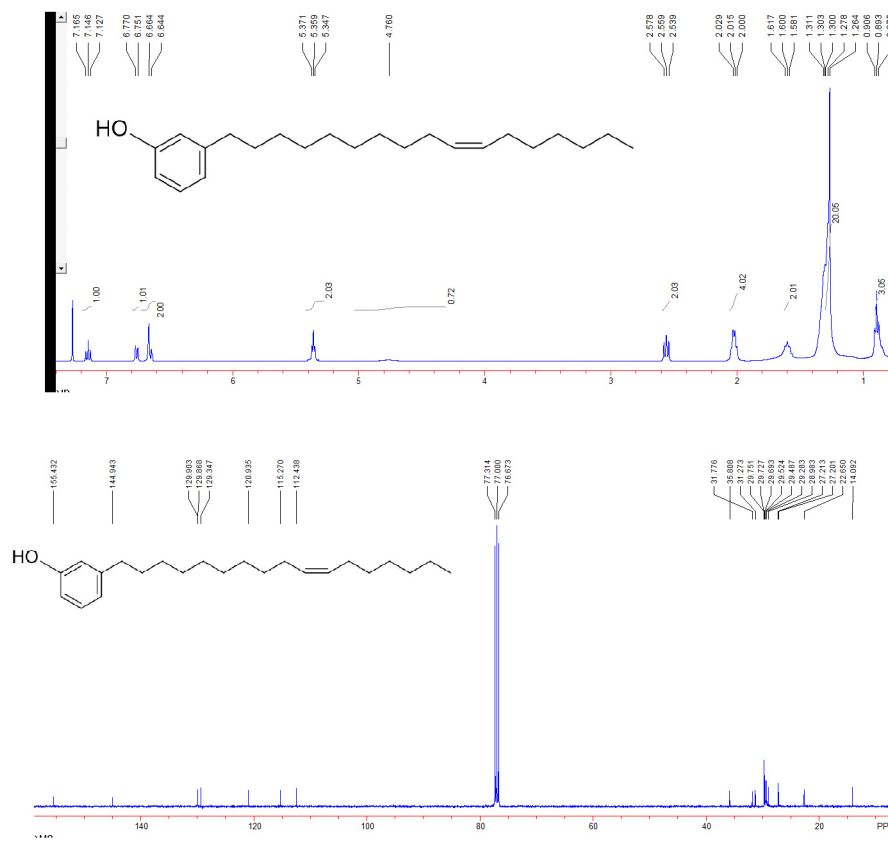

Ginkgol C17:1- $\Delta^{10}$

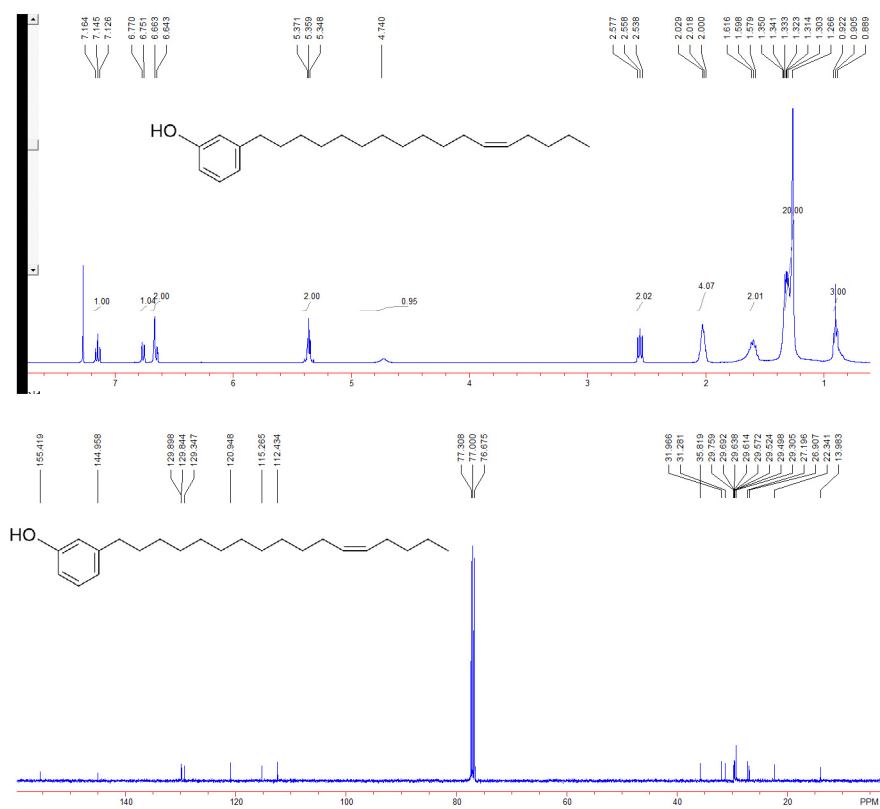

Ginkgol C17:1- $\Delta^{12}$

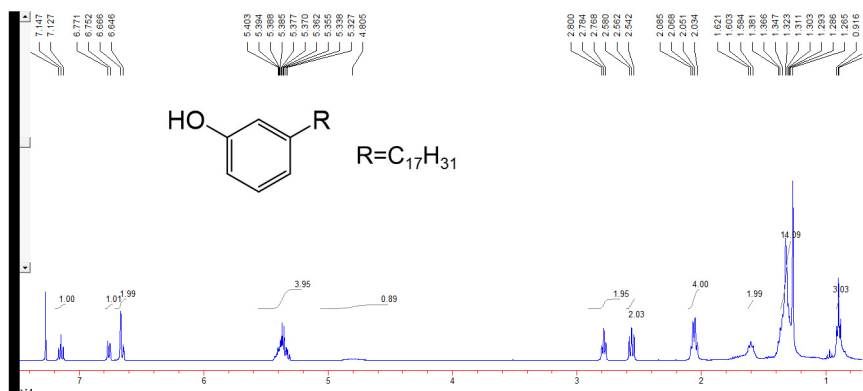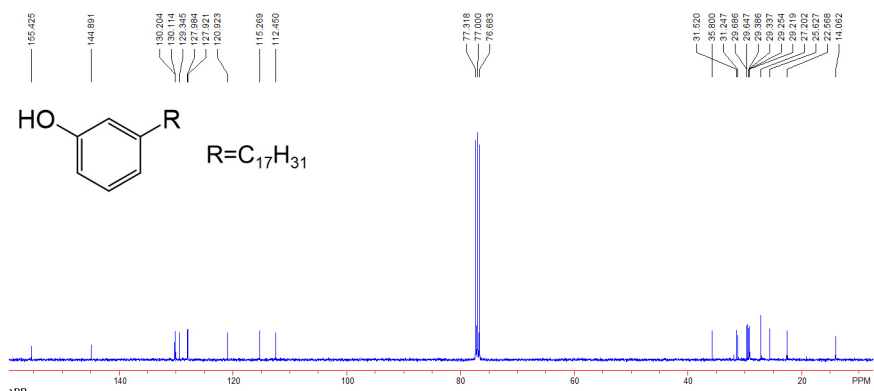

Ginkgol C17:2



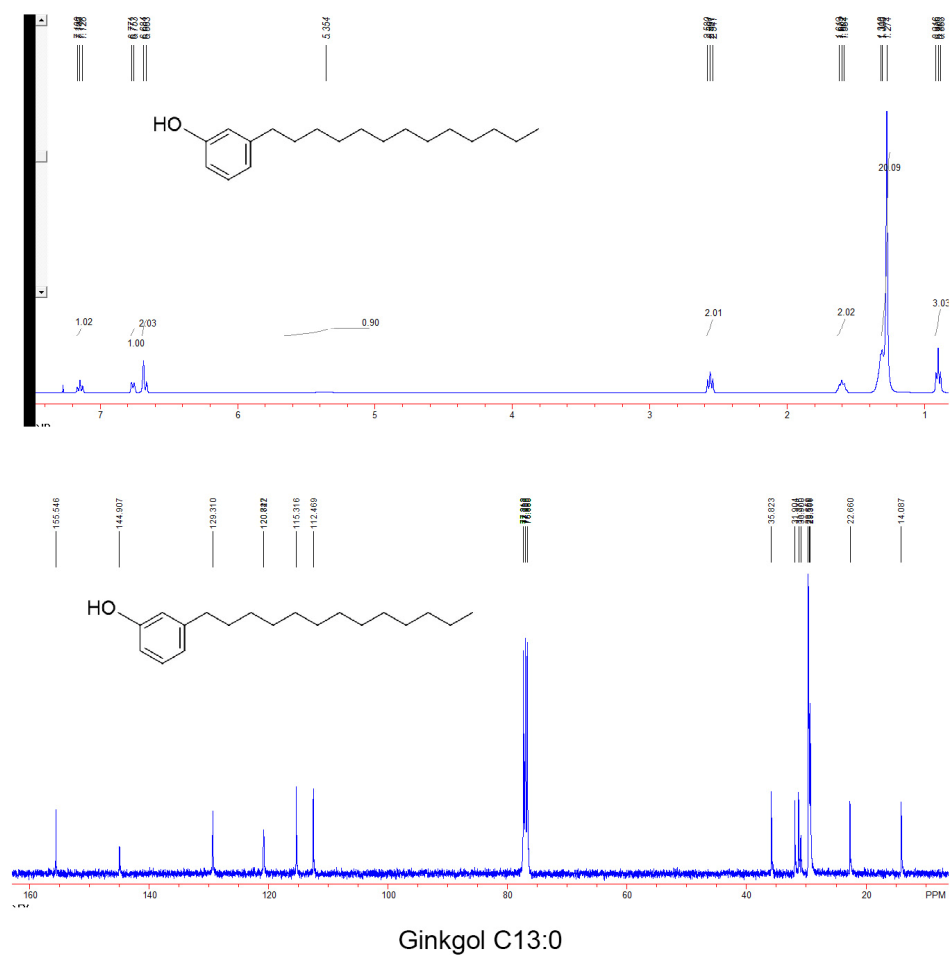

**Figure S3.**  $^1\text{H}$ NMR, and  $^{13}\text{C}$ NMR spectra of six ginkgols.

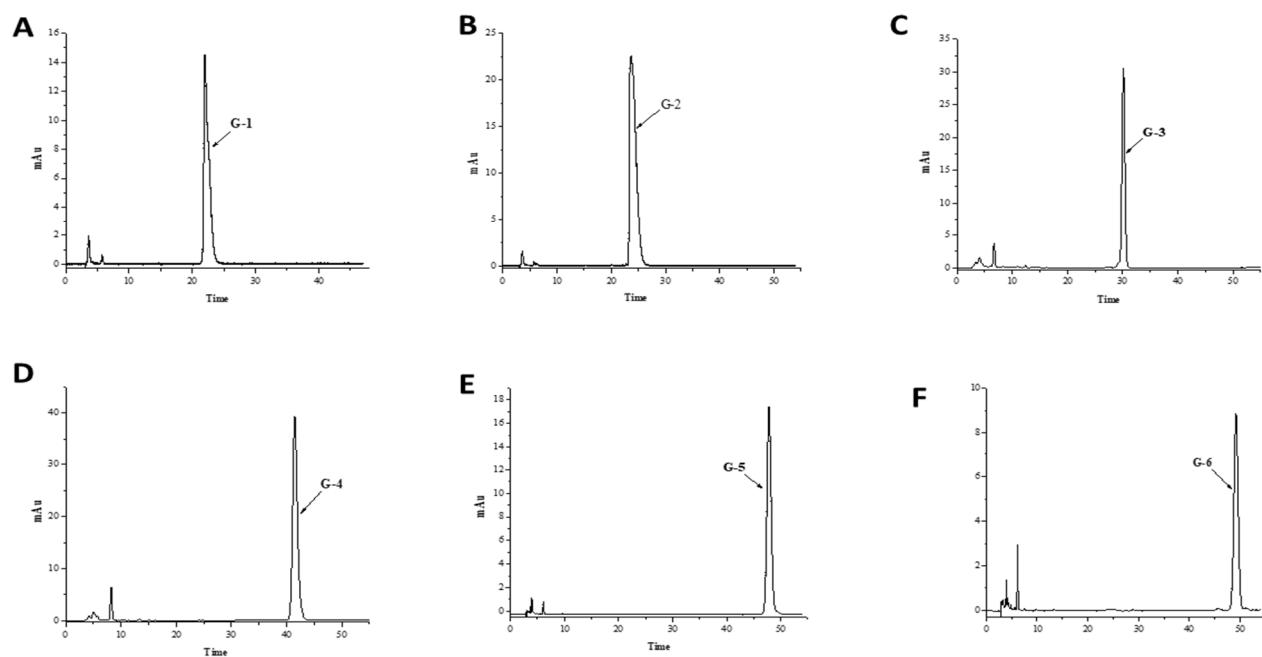

**Figure S4.** The chromatograms of the various ginkgolides G-1, G-2, G-3, G-4, G-5, and G-6.

**Table S1.** Molarity of six ginkgols for anticancer activity assay

| Ginkgol & Molecular weight         |                                          |                            |                |                |                               |                               |
|------------------------------------|------------------------------------------|----------------------------|----------------|----------------|-------------------------------|-------------------------------|
|                                    | C13:0<br>(276)                           | C15:1- $\Delta^8$<br>(302) | C17:2<br>(328) | C15:0<br>(304) | C17:1- $\Delta^{10}$<br>(330) | C17:1- $\Delta^{12}$<br>(330) |
| Concentration ( $\mu\text{g/ml}$ ) | Corresponding molarity ( $\mu\text{M}$ ) |                            |                |                |                               |                               |
| 5                                  | 18.12                                    | 16.56                      | 15.24          | 16.45          | 15.15                         | 15.15                         |
| 10                                 | 36.23                                    | 33.11                      | 30.49          | 32.89          | 30.30                         | 30.30                         |
| 20                                 | 72.46                                    | 66.23                      | 60.98          | 65.79          | 60.61                         | 60.61                         |
| 30                                 | 108.70                                   | 99.34                      | 91.46          | 98.68          | 90.91                         | 90.91                         |
| 40                                 | 144.93                                   | 132.45                     | 121.95         | 131.58         | 121.21                        | 121.21                        |
